# Supplementary material for: New Cretaceous Lacewings in a Transitional Lineage of Myrmeleontoidea and Their Phylogenetic Implications
Source: MDPI journal article supplement (doi:10.3390/insects13050429), 2022-05-05
Supplement: s1 [file s1]

Supplementary material for:

**New Cretaceous lacewings in a transitional lineage of Myrmeleontoidea and their phylogenetic implications**

Xiumei Lu<sup>1</sup>, Chunpeng Xu<sup>2,3</sup>, Xingyue Liu<sup>4\*</sup>

**Contents**

**Table S1. Checklist of Babinskaiidae and Cratosmylidae.**

**Note S1. Morphological character matrix used in the phylogenetic analysis.**

**Table S2. List of characters coded for the phylogenetic analysis.**

**Table S1. Checklist of Babinskaiidae and Cratosmylidae.**

| Family Babinskaiidae Martins-Neto & Vulcano, 1989 |                                                              |                                   |                         |
|---------------------------------------------------|--------------------------------------------------------------|-----------------------------------|-------------------------|
| No.                                               | Species                                                      | Age                               | Locality                |
| 1                                                 | <i>Baisonelia vitimica</i><br>Ponomarenko, 1992              | Lower Cretaceous,<br>Barremian    | Zaza Formation, Russia  |
| 2                                                 | <i>Babinskaia formosa</i><br>Martins-Neto & Vulcano,<br>1989 | Lower Cretaceous, Upper<br>Aptian | Crato Formation, Brazil |
| 3                                                 | <i>Babinskaia pulchra</i><br>Martins-Neto & Vulcano,<br>1989 | Lower Cretaceous, Upper<br>Aptian | Crato Formation, Brazil |
| 4                                                 | <i>Neliana maculata</i><br>(Martins-Neto & Vulcano,<br>1989) | Lower Cretaceous, Upper<br>Aptian | Crato Formation, Brazil |
| 5                                                 | <i>Neliana impolluta</i><br>Martins-Neto, 1997               | Lower Cretaceous, Upper<br>Aptian | Crato Formation, Brazil |
| 6                                                 | <i>Parababinskaia elegans</i><br>Makarkin, Heads &           | Lower Cretaceous, Upper<br>Aptian | Crato Formation, Brazil |

|    |                                                                           |                                      |                                      |
|----|---------------------------------------------------------------------------|--------------------------------------|--------------------------------------|
|    | Wedmann, 2017                                                             |                                      |                                      |
| 7  | <i>Burmobabinskaia tenuis</i> Lu,<br>Zhang & Liu, 2017                    | mid-Cretaceous, lowest<br>Cenomanian | Tanai, Myitkyina, Kachin,<br>Myanmar |
| 8  | <i>Calobabinskaia xiai</i> Lu,<br>Wang & Liu, 2021                        | mid-Cretaceous, Lowest<br>Cenomanian | Tanai, Myitkyina, Kachin,<br>Myanmar |
| 9  | <i>Electrobabinskaia burmana</i><br>Lu, Zhang & Liu, 2017                 | mid-Cretaceous, Lowest<br>Cenomanian | Tanai, Myitkyina, Kachin,<br>Myanmar |
| 10 | <i>Gigantobabinskaia</i><br><i>godunkoi</i> Makarkin &<br>Staniczek, 2019 | mid-Cretaceous, Lowest<br>Cenomanian | Tanai, Myitkyina, Kachin,<br>Myanmar |
| 11 | <i>Stenobabinskaia punctata</i><br>Lu, Wang & Liu, 2021                   | mid-Cretaceous, Lowest<br>Cenomanian | Tanai, Myitkyina, Kachin,<br>Myanmar |
| 12 | <i>Parababinskaia makarkini</i><br>Hu et al., 2018                        | mid-Cretaceous, Lowest<br>Cenomanian | Tanai, Myitkyina, Kachin,<br>Myanmar |
| 13 | <i>Parababinskaia douteaui</i><br>Ngô-Muller et al., 2020                 | mid-Cretaceous, Lowest<br>Cenomanian | Tanai, Myitkyina, Kachin,<br>Myanmar |
| 14 | <i>Pseudobabinskaia</i><br><i>martinsnetoi</i> (Lu, Zhang &<br>Liu, 2017) | mid-Cretaceous, Lowest<br>Cenomanian | Tanai, Myitkyina, Kachin,<br>Myanmar |
| 15 | <i>Pseudoneliaria makarkini</i><br>Huang, André & Dany,<br>2019           | mid-Cretaceous, Lowest<br>Cenomanian | Tanai, Myitkyina, Kachin,<br>Myanmar |
| 16 | <i>Xiaobabinskaia lepidotricha</i><br>Lu, Wang & Liu, 2021                | mid-Cretaceous, Lowest<br>Cenomanian | Tanai, Myitkyina, Kachin,<br>Myanmar |
| 17 | <i>Paraneliana sennlaubi</i><br>Jouault & Nel, 2021                       | mid-Cretaceous, Lowest<br>Cenomanian | Tanai, Myitkyina, Kachin,<br>Myanmar |
| 18 | <i>Paradoxoleon chenruii</i> gen.<br>et sp. nov.                          | mid-Cretaceous, Lowest<br>Cenomanian | Tanai, Myitkyina, Kachin,<br>Myanmar |

| Family Cratosmylidae Makarkin, Heads & Wedmann, 2017 |                                                                      |                                   |                                   |
|------------------------------------------------------|----------------------------------------------------------------------|-----------------------------------|-----------------------------------|
| No.                                                  | Species                                                              | Age                               | Locality                          |
| 1                                                    | <i>Araripenymphes seldeni</i><br>Menon, Martins-Neto & Martill, 2005 | Lower Cretaceous, Upper Aptian    | Crato Formation, Brazil           |
| 2                                                    | <i>Cratosmylus magnificus</i><br>Myskowiak, Escuillie & Nel, 2015    | Lower Cretaceous, Upper Aptian    | Crato Formation, Brazil           |
| 3                                                    | <i>Araripenymphes burmanus</i><br>sp. nov.                           | mid-Cretaceous, Lowest Cenomanian | Tanai, Myitkyina, Kachin, Myanmar |

**Note S1. List of characters coded for the phylogenetic analysis.**

1. Antenna: (0) filiform, not dilated distad ([39]: Fig. 10g5); (1) filiform, but slightly dilated distad ([39]: Fig. 10g1); (2) distinctly clubbed ([39]: Fig. 10g2).
2. Head with prolonged rostrum: (0) absent ([25]: Fig. 2b); (1) present ([40]: Figs. 1898–1899).
3. Prothorax: (0) not elongated anterior to procoxae ([41]: Figs. 13–20); (1) elongated anterior to procoxae ([14]: Fig. 3).
4. Trichosors: (0) present ([18]: Figs. 2, 5, 7); (1) largely reduced or absent ([18]: Fig. 10f).
5. Nygmata: (0) present; (1) absent ([18]: Fig. 10).
6. Forewing shape: (0) distally not strongly narrowed ([18]: Fig. 10a–e); (1) distally strongly narrowed ([18]: Fig. 10f).
7. Forewing: (0) 2.0 times as long as wide ([42]: Fig. 48); (1) slightly longer than wide ([41]: Figs. 13–20); (2) at least 3.0 times as long as wide ([18]: Fig. 10).
8. Crossveins: (0) normal ([18]: Fig. 10a–e); (2) dense ([18]: Fig. 10e).
9. Forewing costal space: (0) not strongly narrowed proximally ([18]: Fig. 10a–e); (1) strongly narrowed proximally ([18]: Fig. 10f).

10. Forewing costal crossveins on proximal part of costal space: (0) simple ([18]: Fig. 10); (2) forked ([42]: Fig. 48).
11. Forewing humeral veinlet: (0) simple ([18]: Fig. 10); (0) recurrent and branched ([42]: Fig. 48).
12. Forewing Sc and RA: (0) not fused distally ([42]: Fig. 48); (1) fused distally ([18]: Fig. 10); (2) allied together with RP into a triplica ([41]: Figs. 13–20).
13. Forewing ScP and RA terminating: (0) anteriad wing apex ([42]: Fig. 48); (1) at or posteriad wing apex ([18]: Fig. 10).
14. Forewing thyridiate crossveins: (0) absent ([18]: Fig. 10b–f); (1) present ([18]: Fig. 10a).
15. Forewing presectoral crossveins: (0) absent ([18]: Fig. 10a, e–f); (1) present, only one ([15]: Fig. 10); (2) present, more than 2 ([18]: Fig. 10b–d); (3) present, more than 10 ([18]: Figs. 2, 5).
16. Forewing RP+MA: (0) diverging almost from wing base ([18]: Fig. 10a, e); (1) diverging slightly distad wing base ([18]: Fig. 10b, d, f); (2) diverging from a position apparently distad wing base ([18]: Figs. 2, 5, 7, 10c).
17. Forewing prehypostigmal cell: (0) rectangular ([18]: Fig. 10a–e); (1) trapezoidal ([18]: Fig. 10f).
18. Forewing hypostigmal cell: (0) short ([18]: Fig. 10a–b, e); (1) long ([18]: Fig. 10c–d, f).
19. Forewing infra radial cell: (0) short ([18]: Fig. 10); (1) long ([15]: Fig. 2).
20. Forewing branching area of RP+MA: (0) without longitudinally directed outer gradate series of crossveins ([18]: Fig. 10a–d, f); (1) with longitudinally directed outer gradate series of crossveins ([18]: Fig. 10e; 15: Fig. 2).
21. Forewing crossvein of branching area of RP+MA: (0) present throughout this region ([18]: Fig. 10a, d, e–f); (1) absent on distal half of this region ([18]: Fig. 10b); (2). slightly reduced ([18]: Fig. 10c)

22. Forewing with distance between diverging points respectively of MA and RP1: (0) as long as distance between diverging points respectively of RP1 and RP2 ([18]: Fig. 10); (1) at least twice as long as distance between diverging points respectively of RP1 and RP2 ([18]: Figs. 2, 5; [15]: Fig. 2).
23. Forewing MA: (0) dichotomously branched or simple ([18]: Fig. 10a–e); (1) pectinately branched ([18]: Fig. 10f).
24. Forewing MP: (0) deeply forked ([18]: Fig. 10a–b); (1) shallowly forked ([23]: Fig. 8); (2) single ([18]: Fig. 10c–f).
25. Forewing MP1 terminating: (0) far from wing apex ([18]: Fig. 7); (1) near wing apex ([18]: Figs. 2, 5).
26. Forewing single MP branches: (0) dichotomously branched or simple ([18]: Fig. 10d–f); (1) pectinate ([18]: Fig. 10c).
27. Forewing with base of MP2 (oblique vein): (0) absent ([18]: Fig. 10c); (1) present ([18]: Fig. 10d–e; [15]: Fig. 2).
28. Forewing, number of CuA branches: (0) 1–4 ([18]: Fig. 10a); (1) 5–9 ([18]: Fig. 10d); (2) at least 10 ([18]: Fig. 10b–c, e–f). Considering the boundary between CuA and CuP is controversial, the boundary of CuA and CuP in Babinskaiidae follows that in Hu et al (see [24]: Fig. 3A).
29. Forewing CuA branched: (0) at distal 1/3 ([18]: Fig. 10a); (1) near or proximad midpoint ([18]: Fig. 10b–f).
30. Forewing MP2+CuA branching area: (0) not triangular ([18]: Fig. 10a–c); (1) subtriangular ([18]: Fig. 10d–f).
31. Forewing CuA: (0) not forked ([18]: Fig. 10a–c); (1) forked ([18]: Figs. 2, 5, 10d–f).
32. Forewing CuA2: (0) longer than CuA1 branches ([18]: Fig. 10d, f); (1) shorter than CuA1 branches ([18]: Fig. 10e).

33. Forewing CuA2: (0) bifurcated ([18]: Fig. 10d, f); (1) with 3-4 pectinate branches ([35]: Fig. 13); (2) with 6 pectinate branches ([18]: Fig. 10e).
34. Forewing MP1 and MP2+CuA: (0) not closely spaced ([18]: Fig. 10c, e); (1) closely spaced ([18]: Fig. 10d, f).
35. Forewing CuA2 origin: (0) distad origin of RP+MA ([18]: Fig. 10d–f); (1) proximad origin of RP+MA ([15]: Fig. 2).
36. Forewing CuP: (0) short ([18]: Fig. 10b, e); (1) long, terminating near proximal 1/3 of hind margin ([18]: Fig. 10a, c); (2) long, terminating anteriorly at midpoint of hind margin ([18]: Fig. 10d, f); (3) extremely long, terminating posteriorly at midpoint of hind margin ([18]: Figs. 2, 5).
37. Forewing CuP: (0) straight ([18]: Fig. 10a–b, d–f); (1) zigzagged ([18]: Figs. 8, 10c).
38. Forewing CuP: (0) not fused with A1 distally ([18]: Fig. 10); (1) fused with A1 distally ([18]: Figs. 2, 5, 7).
39. Forewing A1: (0) shallowly bifurcated ([18]: Fig. 10a, d, f); (1) deeply bifurcated ([42]: Fig. 48); (2) pectinate ([5]: Fig. 109); (3) simple ([18]: Fig. 10c).
40. Hind wing: (0) not strongly tapering distad ([18]: Fig. 10a, b); (1) strongly tapering distad ([18]: Fig. 10c, f).
41. Hind wing: (0) not narrowed ([18]: Fig. 10a, b); (1) slightly narrowed ([15]: Fig. 7); (2) strongly narrowed ([43]: Fig. 1).
42. Hind wing: (0) not elongated, shorter than forewing ([18]: Fig. 10a–c, f); (1) slightly elongated, slightly longer than forewing ([15]: Fig. 7); (2) strongly elongated, apparently longer than forewing ([43]: Fig. 1).
43. Hind wing costal space: (0) narrower than forewing costal space ([18]: Fig. 10a–c); (1) wider than forewing costal space ([18]: Fig. 10f; [15]: Fig. 2).
44. Hind wing costal margin: (0) straight ([18]: Fig. 10a–c); (1) arched ([18]: Fig. 10f).

45. Hind wing RP+MA: (0) diverging almost from wing base ([18]: Fig. 10a); (1) diverging from a position slightly distad wing base ([15]: Fig. 2); (2) diverging from a position near midpoint of wing ([18]: Fig. 10c, f).
46. Hind wing presectorial crossveins: (0) absent ([18]: Fig. 10a); (1) present, only one ([15]: Fig. 10); (2) present, more than 2 ([18]: Fig. 10b–c, f).
47. Hind wing with stem of MA: (0) sigmoid ([42]: Fig. 48); (1) straight or reduced ([18]: Fig. 10a–c, f).
48. Hind wing A2 and A3: (0) preserved ([18]: Fig. 10a); (1) reduced ([18]: Fig. 10c).
49. Tibial spur: (0) small or reduced ([18]: Fig. 1g); (1) long and stout ([15]: Fig. 11).
50. Foreleg arolium: (0) simple ([24]: Fig. 1d); (1) bilobed ([18]: Fig. 1f).
51. Male gonocoxites 9: (0) present as a pair of large external sclerites ([44]: Fig. 3d); (1) present as a pair of relatively small and internal sclerites ([25]: Fig. 2g).
52. Male gonocoxites 9 and gonocoxites 11: (0) not associated tightly into a complex structure ([31]: Figs. 88–89); (1) associated tightly into a complex structure ([31]: Figs. 94–96).
53. Female trichobothria: (0) rosette ([25]: Fig. 4); (1) absent ([15]: Fig. 3).
54. Female sternum 6: (0) posteriorly without elongated processes ([24]: Fig. 7c); (1) posteriorly with elongated processes ([24]: Fig. 7a–b).

**Table S2. Morphological character matrix used in the phylogenetic analysis.**

| No. | Taxon                 | 01 | 02 | 03 | 04 | 05 | 06 | 07 | 08 | 09 | 10 | 11 | 12 | 13 | 14 | 15 | 16 | 17 | 18 | 19 | 20 | 21 | 22 | 23 | 24  | 25 | 26 | 27 |
|-----|-----------------------|----|----|----|----|----|----|----|----|----|----|----|----|----|----|----|----|----|----|----|----|----|----|----|-----|----|----|----|
| 1   | <i>Gumilla</i>        | 0  | 0  | 0  | 0  | 0  | 0  | 2  | 0  | 0  | 0  | 0  | 1  | 0  | 0  | 0  | 0  | 0  | 1  | 0  | 0  | 0  | 0  | 0  | 0   | 0  | -  | 0  |
| 2   | <i>Ithone</i>         | 0  | 0  | 0  | 0  | 0  | 0  | 0  | 0  | 0  | 1  | 1  | 0  | 0  | 0  | 0  | 0  | 0  | 1  | 0  | 0  | 0  | 0  | 0  | 0   | 0  | -  | 0  |
| 3   | <i>Balmes</i>         | 0  | 0  | 0  | 0  | 0  | 0  | 1  | 0  | 0  | 1  | 1  | 2  | 0  | 0  | 0  | 0  | 0  | 1  | 0  | 0  | 2  | 0  | 0  | 0   | 0  | -  | 0  |
| 4   | <i>Nesydrion</i>      | 0  | 0  | 1  | 0  | 1  | 0  | 2  | 0  | 0  | 0  | 0  | 1  | 1  | 1  | 0  | 0  | 0  | 1  | 0  | 0  | 0  | 0  | 0  | 0   | 0  | -  | 0  |
| 5   | <i>Nymphes</i>        | 0  | 0  | 1  | 0  | 1  | 0  | 2  | 0  | 0  | 0  | 0  | 1  | 1  | 1  | 0  | 0  | 0  | 1  | 0  | 0  | 0  | 1  | 0  | 0&1 | 0  | -  | 0  |
| 6   | <i>Norfolius</i>      | 0  | 0  | 1  | 0  | 1  | 0  | 2  | 0  | 0  | 0  | 0  | 1  | 1  | 1  | 0  | 0  | 0  | 1  | 0  | 0  | 0  | 0  | 0  | 0   | 0  | -  | 0  |
| 7   | <i>Osmylops</i>       | 0  | 0  | 1  | 0  | 1  | 0  | 2  | 0  | 0  | 0  | 0  | 1  | 1  | 1  | 0  | 0  | 0  | 1  | 0  | 0  | 0  | 0  | 0  | 0   | 0  | -  | 0  |
| 8   | <i>Liminympa</i>      | 0  | ?  | 1  | 0  | 1  | 0  | 2  | 0  | 0  | 0  | 1  | 1  | 1  | ?  | 0  | 0  | 0  | 1  | 0  | 0  | 0  | 0  | 0  | 0   | 0  | -  | 0  |
| 9   | <i>Cratosmylus</i>    | ?  | ?  | 0  | 0  | 1  | 0  | 0  | 0  | 0  | 0  | 0  | 1  | 1  | 0  | 2  | 1  | 0  | 0  | 0  | 0  | 1  | 0  | ?  | 0   | 0  | -  | 0  |
| 10  | <i>Araripenympes</i>  | ?  | ?  | 0  | 0  | 1  | 0  | 2  | 0  | 0  | 0  | 0  | 1  | 1  | 0  | 2  | 1  | 0  | ?  | 0  | 0  | 1  | 0  | 0  | 0   | 0  | -  | 0  |
| 11  | <i>Paradoxoleon</i>   | 0  | 0  | 0  | 0  | 1  | 0  | 2  | 0  | 0  | ?  | 0  | 1  | 1  | 0  | 2  | 2  | 0  | 1  | 0  | 0  | 2  | 0  | 0  | 0   | 0  | -  | 0  |
| 12  | <i>Neliana</i>        | 0  | 0  | 0  | 0  | 1  | 0  | 2  | 0  | 0  | 0  | 0  | 1  | 1  | 0  | 2  | 2  | 0  | 1  | 0  | 0  | 2  | 0  | 0  | 1&2 | 0  | 1  | 0  |
| 13  | <i>Paraneliana</i>    | ?  | 0  | 0  | ?  | 1  | 0  | 2  | 0  | 0  | 0  | 0  | 1  | ?  | 0  | 2  | 2  | 0  | 1  | 0  | 0  | 2  | 0  | 0  | 2   | 0  | 1  | 0  |
| 14  | <i>Parababinskaia</i> | 0  | 0  | 0  | 0  | 1  | 0  | 2  | 0  | 0  | 0  | 0  | 1  | 1  | 0  | 2  | 2  | 0  | 1  | 0  | 0  | 2  | 0  | 0  | 2   | 1  | 1  | 0  |
| 15  | <i>Babinskaia</i>     | 0  | 0  | 0  | 0  | 1  | 0  | 2  | 0  | 0  | 0  | 0  | 1  | 1  | 0  | 2  | 2  | 0  | 1  | 0  | 0  | 2  | 0  | 0  | 2   | 0  | 1  | 0  |



|    |                          |   |   |   |   |   |   |   |   |   |   |   |   |   |   |   |   |   |   |   |   |   |   |   |   |   |   |   |
|----|--------------------------|---|---|---|---|---|---|---|---|---|---|---|---|---|---|---|---|---|---|---|---|---|---|---|---|---|---|---|
| 16 | <i>Burmobabinskaia</i>   | 0 | 0 | 0 | 0 | 1 | ? | ? | 0 | 0 | 0 | 0 | ? | ? | 0 | 2 | 2 | 0 | ? | 0 | 0 | 2 | 0 | 0 | 2 | 1 | 1 | 0 |
| 17 | <i>Electrobabinskaia</i> | 0 | 0 | 0 | 0 | 1 | 0 | 2 | 0 | 0 | 0 | 0 | 1 | 1 | 0 | 2 | 2 | 0 | 1 | 0 | 0 | 2 | 0 | 0 | 2 | 0 | 1 | 0 |
| 18 | <i>Pseudobabinskaia</i>  | 0 | 0 | 0 | 0 | 1 | 0 | 2 | 0 | 0 | 0 | 0 | 1 | 1 | 0 | 2 | 2 | 0 | 1 | 0 | 0 | 2 | 0 | 0 | 2 | 1 | 1 | 0 |
| 19 | <i>Gigantobabinskaia</i> | 0 | ? | 0 | 0 | 1 | ? | ? | 0 | 0 | 1 | 0 | ? | ? | 0 | 2 | 2 | ? | ? | ? | ? | ? | 0 | ? | 2 | ? | 1 | 0 |
| 20 | <i>Calobabinskaia</i>    | 0 | 0 | 0 | 0 | 1 | 0 | 2 | 0 | 0 | 0 | 0 | 1 | 1 | 0 | 3 | 2 | 1 | 1 | 0 | 0 | 2 | 1 | 0 | 2 | 1 | 1 | 0 |
| 21 | <i>Stenobabinskaia</i>   | 0 | 0 | 0 | 0 | 1 | 0 | 2 | 0 | 0 | 0 | 0 | 1 | 1 | 0 | 3 | 2 | 1 | 1 | 0 | 0 | 1 | 1 | 0 | 2 | 1 | 1 | 0 |
| 22 | <i>Xiaobabinskaia</i>    | 0 | 0 | 0 | 0 | 1 | 0 | 2 | 0 | 0 | 0 | 0 | 1 | 1 | 0 | 2 | 2 | 0 | 1 | 0 | 0 | 1 | 0 | 0 | 2 | 0 | 1 | 0 |
| 23 | <i>Roesleriana</i>       | 1 | 1 | 0 | 1 | 1 | 0 | 2 | 0 | 0 | 0 | 0 | 1 | 1 | 0 | 0 | 1 | 0 | 1 | 0 | 0 | 0 | 0 | 0 | 2 | 0 | 0 | 1 |
| 24 | <i>Pastranaia</i>        | 0 | 1 | 0 | 1 | 1 | 0 | 2 | 0 | 0 | 0 | 0 | 1 | 1 | 0 | 2 | 1 | 0 | 1 | 0 | 0 | 0 | 0 | 0 | 2 | 0 | 0 | 1 |
| 25 | <i>Choromyrmeleon</i>    | 2 | 0 | 0 | 1 | 1 | 0 | 2 | 0 | 0 | 0 | 0 | 1 | 1 | 0 | 0 | 1 | 0 | 1 | 1 | 0 | 0 | 0 | 0 | 2 | 0 | 0 | 1 |
| 26 | <i>Caririneura</i>       | 2 | 0 | 0 | 1 | 1 | 0 | 2 | 0 | 0 | 0 | 0 | 1 | 1 | 0 | 0 | 1 | 1 | 1 | 1 | 0 | 0 | 0 | 1 | 2 | 0 | 0 | 0 |
| 27 | <i>Cratoneura</i>        | 2 | 0 | 0 | 1 | 1 | 1 | 2 | 0 | 1 | 0 | 0 | 1 | 1 | 0 | 0 | 1 | 1 | 1 | 1 | 1 | 0 | 1 | 1 | 2 | 0 | 0 | 0 |
| 28 | <i>Cratopteryx</i>       | 2 | 0 | 0 | 1 | 1 | 0 | 2 | 0 | 0 | 0 | 0 | 1 | 1 | 0 | 0 | 1 | 1 | 1 | 1 | 0 | 0 | 0 | 1 | 2 | 0 | 0 | 1 |
| 29 | <i>Paracaririneura</i>   | 2 | 0 | 0 | 1 | 1 | 0 | 2 | 0 | 0 | 0 | 0 | 1 | 1 | 0 | 0 | 1 | 1 | 1 | 0 | 0 | 0 | 1 | 1 | 2 | 0 | 0 | 0 |
| 30 | <i>Araripeneura</i>      | 2 | 0 | 0 | 1 | 1 | 0 | 2 | 0 | 0 | 0 | 0 | 1 | 1 | 0 | 0 | 1 | 1 | 1 | 1 | 0 | 0 | 1 | 1 | 2 | 0 | 0 | 0 |
| 31 | <i>Caldasia</i>          | 2 | 0 | 0 | 1 | 1 | 0 | 2 | 0 | 0 | 0 | 0 | 1 | 1 | 0 | 0 | 1 | 1 | 1 | 1 | 0 | 0 | 0 | 1 | 2 | 0 | 0 | 0 |
| 32 | <i>Cratoalloneura</i>    | 2 | 0 | 0 | 1 | 1 | 1 | 2 | 0 | 1 | 0 | 0 | 1 | 1 | 0 | 0 | 1 | 1 | 1 | 1 | 1 | 0 | 1 | 1 | 2 | 0 | 0 | 1 |

|    |                        |   |   |   |   |   |   |   |   |   |   |   |   |   |   |   |   |   |   |   |   |   |   |   |     |   |   |   |
|----|------------------------|---|---|---|---|---|---|---|---|---|---|---|---|---|---|---|---|---|---|---|---|---|---|---|-----|---|---|---|
| 33 | <i>Allopteroneura</i>  | 2 | 0 | 0 | 1 | 1 | 1 | 2 | 0 | 1 | 0 | 0 | 1 | ? | 0 | 0 | 1 | 1 | 1 | 1 | 1 | 0 | 1 | 1 | 2   | 0 | 0 | 1 |
| 34 | <i>Phylloleon</i>      | 2 | 0 | 0 | 1 | 1 | 1 | 2 | 0 | 1 | 0 | 0 | 1 | 1 | 0 | 0 | 1 | 1 | 1 | 0 | 0 | 0 | 0 | 1 | 2   | 0 | 0 | 1 |
| 35 | <i>Burmanaura</i>      | 2 | 0 | 0 | 1 | 1 | ? | 2 | 0 | 0 | 0 | 0 | ? | ? | 0 | 0 | 1 | ? | ? | ? | ? | 0 | ? | ? | 2   | 0 | ? | 0 |
| 36 | <i>Nanoleon</i>        | 2 | 0 | 0 | 1 | 1 | 0 | 2 | 0 | 0 | 0 | 0 | 1 | 1 | 0 | 1 | 1 | 0 | 1 | 0 | 0 | 0 | 0 | 0 | 2   | 0 | 0 | 0 |
| 37 | <i>Bleyeria</i>        | 2 | 0 | 0 | 1 | 1 | 0 | 2 | 0 | 0 | 0 | 0 | 1 | 1 | 0 | 0 | 1 | 0 | 0 | 0 | 0 | 0 | 0 | 0 | 2   | 0 | 0 | 1 |
| 38 | <i>Blittersdorffia</i> | 2 | 0 | 0 | 1 | 1 | 0 | 2 | 0 | 0 | 0 | 0 | 1 | 1 | 0 | 0 | 1 | 0 | 1 | 0 | 0 | 0 | 1 | 0 | 2   | 0 | 0 | 1 |
| 39 | <i>Pseudonymphes</i>   | 2 | 0 | 0 | 0 | 1 | 0 | 2 | 0 | 0 | 0 | 0 | 1 | 1 | 0 | 0 | 1 | 0 | 1 | 0 | 0 | 0 | 0 | 0 | 0&2 | 0 | 0 | 1 |
| 40 | <i>Palpares</i>        | 2 | 0 | 0 | 1 | 1 | 0 | 2 | 0 | 0 | 0 | 0 | 1 | 1 | 0 | 2 | 1 | 0 | 1 | 0 | 0 | 0 | 0 | 0 | 2   | 0 | 0 | 1 |
| 41 | <i>Stilbopteryx</i>    | 2 | 0 | 0 | 1 | 1 | 0 | 2 | 0 | 0 | 0 | 0 | 1 | 1 | 0 | 2 | 1 | 0 | 1 | 0 | 0 | 0 | 0 | 0 | 2   | 0 | 0 | 1 |
| 42 | <i>Myrmeleon</i>       | 2 | 0 | 0 | 1 | 1 | 0 | 2 | 0 | 0 | 0 | 0 | 1 | 1 | 0 | 2 | 1 | 0 | 1 | 0 | 0 | 0 | 0 | 0 | 2   | 0 | 0 | 1 |
| 43 | <i>Guyiling</i>        | 1 | 0 | 0 | 1 | 1 | 0 | ? | 1 | 0 | 0 | 0 | 1 | ? | 0 | 0 | 0 | 0 | ? | 0 | 1 | 0 | 1 | ? | 2   | 0 | 0 | 1 |
| 44 | <i>Baisopardus</i>     | 0 | 0 | 0 | 1 | 1 | 0 | 2 | 1 | 0 | 0 | 0 | 1 | 1 | 0 | 0 | 0 | 0 | 0 | 0 | 1 | 0 | 1 | 0 | 2   | 0 | 0 | 1 |
| 45 | <i>Parapalaeoleon</i>  | 0 | 0 | 0 | 1 | 1 | 0 | 2 | 1 | 0 | 0 | 0 | 1 | 1 | 0 | 0 | 0 | 0 | 0 | 0 | 1 | 0 | 1 | 0 | 2   | 0 | 0 | 1 |
| 46 | <i>Paraneurastenyx</i> | ? | ? | 0 | 1 | 1 | 0 | 2 | 0 | 0 | 0 | 0 | 1 | 1 | 0 | 0 | 0 | 0 | 0 | 0 | 1 | 0 | 0 | ? | 2   | 0 | 0 | 1 |

| No. | Taxon                  | 28  | 29 | 30 | 31 | 32 | 33 | 34 | 35 | 36 | 37 | 38 | 39 | 40 | 41 | 42 | 43 | 44 | 45 | 46 | 47 | 48 | 49 | 50 | 51 | 52 | 53 | 54 |
|-----|------------------------|-----|----|----|----|----|----|----|----|----|----|----|----|----|----|----|----|----|----|----|----|----|----|----|----|----|----|----|
| 1   | <i>Gumilla</i>         | 0   | 0  | 0  | 1  | 0  | 0  | 0  | 0  | 1  | 1  | 0  | 2  | 0  | 0  | 0  | 0  | 0  | 0  | 0  | 1  | 0  | 0  | 0  | 0  | 0  | 0  | 0  |
| 2   | <i>Ithone</i>          | 1   | 1  | 1  | 0  | 0  | 3  | 0  | 0  | 1  | 0  | 0  | 1  | 0  | 0  | 0  | 0  | 0  | 0  | 0  | 0  | 0  | 0  | 0  | 1  | 0  | 0  | 0  |
| 3   | <i>Balmes</i>          | 1   | 0  | 0  | 0  | 1  | 3  | 0  | 0  | 1  | 0  | 0  | 1  | 0  | 0  | 0  | 0  | 0  | 0  | 0  | 1  | 0  | 0  | 0  | 1  | 0  | 0  | 0  |
| 4   | <i>Nesydrion</i>       | 0   | 0  | 0  | 0  | 1  | 0  | 0  | 0  | 1  | 0  | 0  | 0  | 0  | 0  | 0  | 0  | 0  | 0  | 2  | 1  | 0  | 0  | 1  | 1  | 0  | 0  | 0  |
| 5   | <i>Nymphes</i>         | 1   | 1  | 1  | 0  | 1  | 3  | 0  | 0  | 1  | 0  | 0  | 0  | 0  | 0  | 0  | 0  | 0  | 0  | 0  | 1  | 0  | 0  | 1  | 1  | 0  | 0  | 0  |
| 6   | <i>Norfolius</i>       | 0   | 0  | 0  | 0  | 1  | 0  | 0  | 0  | 2  | 0  | 0  | 2  | 0  | 0  | 0  | 0  | 0  | 0  | 0  | 1  | 0  | 0  | 1  | 1  | 0  | 0  | 0  |
| 7   | <i>Osmylops</i>        | 0   | 0  | 0  | 0  | 1  | 0  | 0  | 0  | 2  | 0  | 0  | 2  | 0  | 0  | 0  | 0  | 0  | 0  | 0  | 1  | 0  | 0  | 1  | 1  | 0  | 0  | 0  |
| 8   | <i>Liminympa</i>       | 1   | 0  | 0  | 0  | 1  | 0  | 0  | 0  | 2  | 1  | 0  | 2  | 0  | 0  | 0  | 0  | 0  | 0  | 0  | 1  | ?  | ?  | ?  | ?  | ?  | ?  | ?  |
| 9   | <i>Cratosmylus</i>     | ?   | 1  | 0  | ?  | ?  | ?  | 0  | 0  | 1  | ?  | 1  | -  | 0  | 0  | 0  | 0  | 0  | 1  | 2  | 1  | 1  | ?  | ?  | ?  | ?  | ?  | ?  |
| 10  | <i>Araripenymphes</i>  | 2   | 1  | 0  | 0  | 1  | ?  | 0  | 1  | 0  | 0  | 0  | 3  | 0  | 0  | 0  | 0  | 0  | 1  | 2  | 1  | ?  | ?  | ?  | ?  | ?  | ?  | ?  |
| 11  | <i>Paradoxoleon</i>    | 0   | 0  | 0  | 0  | 1  | 3  | 0  | 0  | 2  | 1  | 1  | 3  | 0  | 0  | 0  | 0  | 0  | 2  | 2  | 1  | 1  | 0  | 0  | ?  | ?  | ?  | ?  |
| 12  | <i>Neliana</i>         | 1&2 | 1  | 0  | 0  | 1  | 3  | 0  | 1  | 1  | 1  | 0  | 0  | 0  | 0  | 0  | 0  | 0  | 2  | 2  | 1  | 1  | 0  | ?  | ?  | ?  | ?  | ?  |
| 13  | <i>Paraneliana</i>     | 1   | 1  | 0  | 0  | 1  | 3  | 0  | 1  | 1  | 1  | 0  | 0  | 0  | 0  | 0  | 0  | 0  | 2  | 2  | 1  | ?  | ?  | ?  | ?  | ?  | ?  | ?  |
| 14  | <i>Parababinskaia</i>  | 1&2 | 1  | 0  | 0  | 1  | 3  | 0  | 0  | 1  | 1  | 0  | 0  | 0  | 0  | 0  | 0  | 0  | 2  | 2  | 1  | 1  | 0  | 0  | 1  | ?  | 0  | 0  |
| 15  | <i>Babinskaia</i>      | 1   | 1  | 0  | 0  | 1  | 3  | 0  | 1  | 1  | 1  | 0  | 0  | 0  | 0  | 0  | 0  | 0  | 2  | 2  | 1  | 1  | 0  | ?  | ?  | ?  | ?  | ?  |
| 16  | <i>Burmobabinskaia</i> | ?   | 1  | 0  | 0  | 1  | 3  | 0  | 1  | 1  | 1  | 0  | 3  | ?  | 2  | ?  | 0  | 0  | 2  | 2  | 1  | 1  | 0  | 0  | 1  | ?  | ?  | ?  |

|    |                          |   |   |   |   |   |   |   |   |   |   |   |   |   |   |   |   |   |   |   |   |   |   |   |   |   |   |   |
|----|--------------------------|---|---|---|---|---|---|---|---|---|---|---|---|---|---|---|---|---|---|---|---|---|---|---|---|---|---|---|
| 17 | <i>Electrobabinskaia</i> | 2 | 1 | 0 | 0 | 1 | 3 | 0 | 1 | 1 | 1 | 0 | 3 | 1 | 0 | 0 | 0 | 0 | 2 | 2 | 1 | 1 | 0 | 0 | 1 | ? | 0 | 1 |
| 18 | <i>Pseudobabinskaia</i>  | 1 | 1 | 0 | 0 | 1 | 3 | 0 | 1 | 1 | 1 | 0 | 3 | 0 | 0 | 0 | 0 | 0 | 2 | 2 | 1 | 1 | 0 | 0 | ? | ? | 0 | 1 |
| 19 | <i>Gigantobabinskaia</i> | ? | 1 | ? | 0 | 1 | 3 | 0 | 1 | 1 | 1 | 0 | 3 | 1 | 0 | 0 | 0 | 0 | 2 | 2 | 1 | 1 | 0 | 0 | ? | ? | ? | ? |
| 20 | <i>Calobabinskaia</i>    | 1 | 1 | 0 | 1 | 0 | 0 | 0 | 0 | 3 | 0 | 1 | - | 0 | 0 | 0 | 0 | 0 | 2 | 2 | 1 | ? | 0 | 1 | ? | ? | ? | ? |
| 21 | <i>Stenobabinskaia</i>   | 2 | 1 | 0 | 1 | 0 | 0 | 0 | 0 | 3 | 0 | 1 | - | 0 | 0 | 0 | 0 | 0 | 2 | 2 | 1 | 1 | 0 | ? | 1 | ? | ? | ? |
| 22 | <i>Xiaobabinskaia</i>    | 2 | 1 | 0 | 0 | 1 | 3 | 0 | 0 | 1 | 1 | 1 | - | 1 | 0 | 0 | 0 | 0 | 2 | 2 | 1 | 1 | 0 | 0 | ? | ? | ? | 0 |
| 23 | <i>Roesleriana</i>       | 2 | 1 | 1 | 0 | 0 | 3 | 1 | 0 | 1 | 0 | ? | ? | - | 2 | 2 | 0 | 0 | 0 | 0 | 1 | - | 0 | 0 | 1 | 0 | 0 | 0 |
| 24 | <i>Pastranaia</i>        | 1 | 1 | 1 | 1 | 0 | 0 | 1 | 0 | 1 | 0 | 0 | 0 | - | 2 | 2 | 0 | 0 | 0 | 0 | 1 | - | 0 | 0 | 1 | 0 | 0 | 0 |
| 25 | <i>Choromyrmeleon</i>    | 1 | 1 | 1 | 1 | 1 | 0 | 0 | 0 | 1 | 0 | 0 | 3 | 0 | 0 | 0 | 0 | 0 | 1 | 0 | 1 | ? | ? | ? | ? | ? | ? | ? |
| 26 | <i>Caririneura</i>       | 1 | 1 | 1 | 1 | 0 | 0 | 1 | 1 | 1 | 0 | 0 | 2 | 1 | 1 | 0 | 0 | 0 | 2 | 2 | 1 | ? | ? | ? | ? | ? | ? | ? |
| 27 | <i>Cratoneura</i>        | 2 | 1 | 1 | 0 | 0 | 3 | 1 | 1 | 1 | 0 | ? | ? | 1 | 0 | 0 | 1 | 1 | 1 | 0 | 1 | ? | ? | ? | ? | ? | ? | ? |
| 28 | <i>Cratopteryx</i>       | 1 | 1 | 1 | 1 | 0 | 0 | 1 | 0 | 1 | 0 | ? | ? | 1 | 0 | 0 | 0 | 0 | 1 | 0 | 1 | ? | ? | ? | ? | ? | ? | ? |
| 29 | <i>Paracaririneura</i>   | 1 | 1 | 1 | 1 | 0 | 0 | 1 | 0 | 1 | 0 | 0 | 3 | ? | ? | ? | ? | ? | ? | ? | ? | ? | ? | ? | ? | ? | ? | ? |
| 30 | <i>Araripeneura</i>      | 1 | 1 | 1 | 1 | 0 | 0 | 1 | 1 | 1 | 0 | 0 | 3 | 1 | 0 | 0 | 0 | 0 | 1 | 0 | 1 | ? | ? | ? | ? | ? | ? | ? |
| 31 | <i>Caldasia</i>          | ? | ? | ? | ? | ? | ? | 1 | 1 | ? | ? | ? | ? | 1 | 0 | 0 | 1 | 1 | ? | ? | ? | ? | ? | ? | ? | ? | ? | ? |
| 32 | <i>Cratoalloneura</i>    | 1 | 1 | 1 | 1 | 0 | 0 | 1 | 1 | 1 | 0 | 0 | 0 | 1 | 0 | 0 | 1 | 1 | 1 | 0 | 1 | ? | ? | ? | ? | ? | ? | ? |
| 33 | <i>Allopteroneura</i>    | 2 | 1 | 1 | 1 | 0 | 0 | 1 | 1 | 1 | 0 | 0 | 0 | 1 | 0 | 0 | 1 | 1 | 1 | 0 | 1 | ? | 1 | 0 | ? | ? | ? | ? |

[illegible]
